# Supplementary material for: The promoting influence of nickel species in the controllable synthesis and catalytic properties of nickel–ceria catalysts
Source: Royal Society of Chemistry journal article supplement (doi:10.1039/c5cy01241d), 2015-11-19
Supplement: c5cy01241d1.pdf [file c5cy01241d1.pdf]

## The promoting influence of the nickel species in the controllable synthesis and catalytic property of the nickel-ceria catalysts

Wei Liu,<sup>a</sup> Wenzhi Wang,<sup>b</sup> Ke Tang,<sup>a</sup> Jinxin Guo,<sup>a</sup> Yuqing Ren,<sup>a</sup> Shuping Wang,<sup>a</sup> Lijun Feng,<sup>a</sup> and Yanzhao Yang,<sup>a\*</sup>

<sup>a</sup> Key Laboratory for Special Functional Aggregate Materials of Education Ministry, School of Chemistry and Chemical Engineering, Shandong University, Jinan 250100, PR China. E-mail: yzhyang@sdu.edu.cn; Fax: +86 531 88564464; Tel: +86 531 88362988.

<sup>b</sup> Shandong Experimental High School, Jinan, 250001, PR China

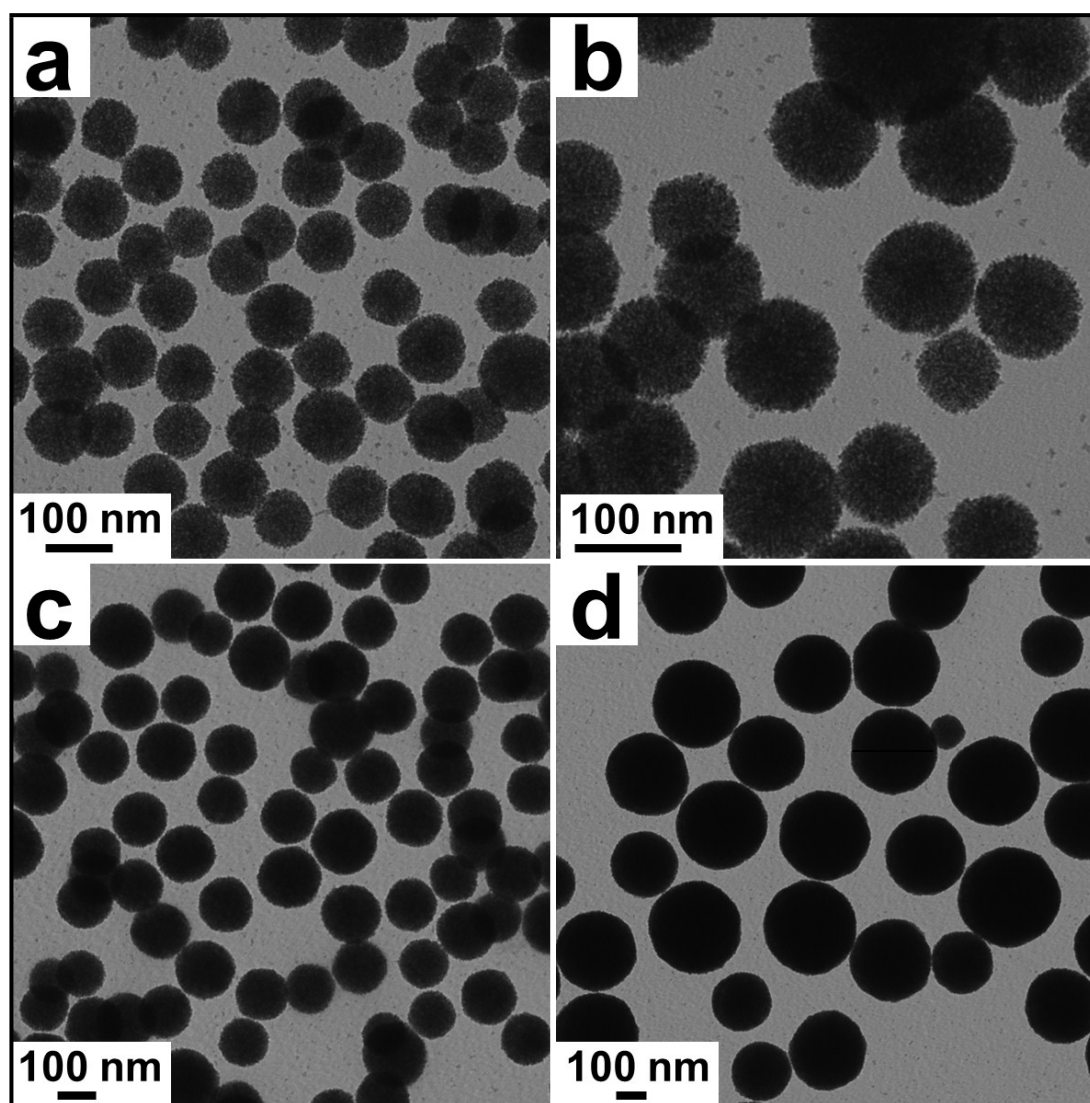

Fig. S1 The TEM images of the as-prepared cobalt-ceria samples when different volume of the 0.5M  $\text{Co}(\text{NO}_3)_2$  solution is added: (a) 115  $\mu\text{L}$ , (b) 230  $\mu\text{L}$ , (c) 460  $\mu\text{L}$ , (d) 575  $\mu\text{L}$ .

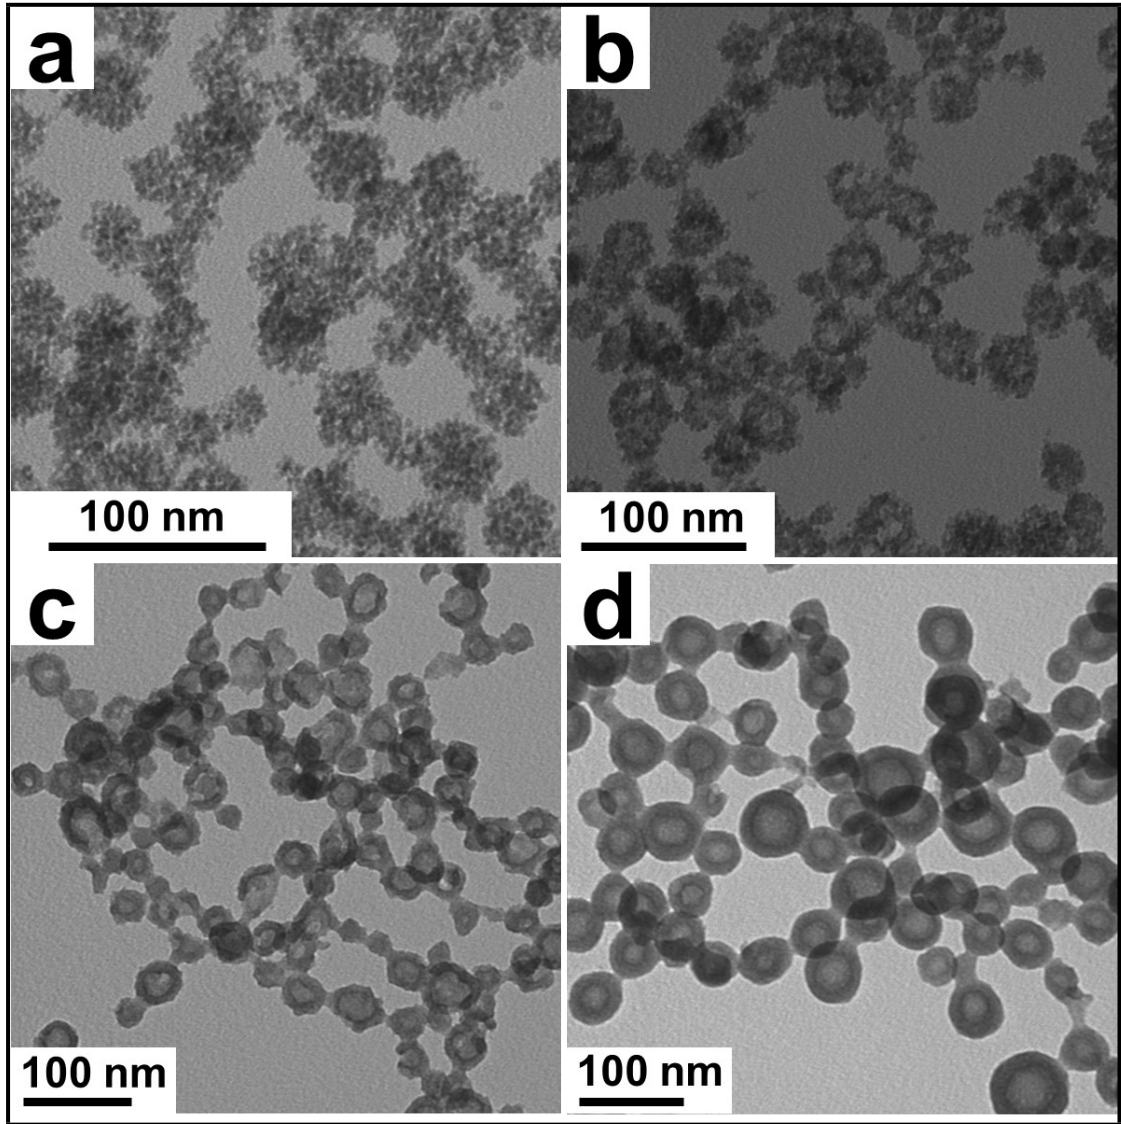

Fig. S2 The TEM images of the as-prepared copper-ceria samples when different volume of the 0.5M  $\text{Cu}(\text{NO}_3)_2$  solution is added: (a) 115  $\mu\text{L}$ , (b) 230  $\mu\text{L}$ , (c) 460  $\mu\text{L}$ , (d) 575  $\mu\text{L}$ .

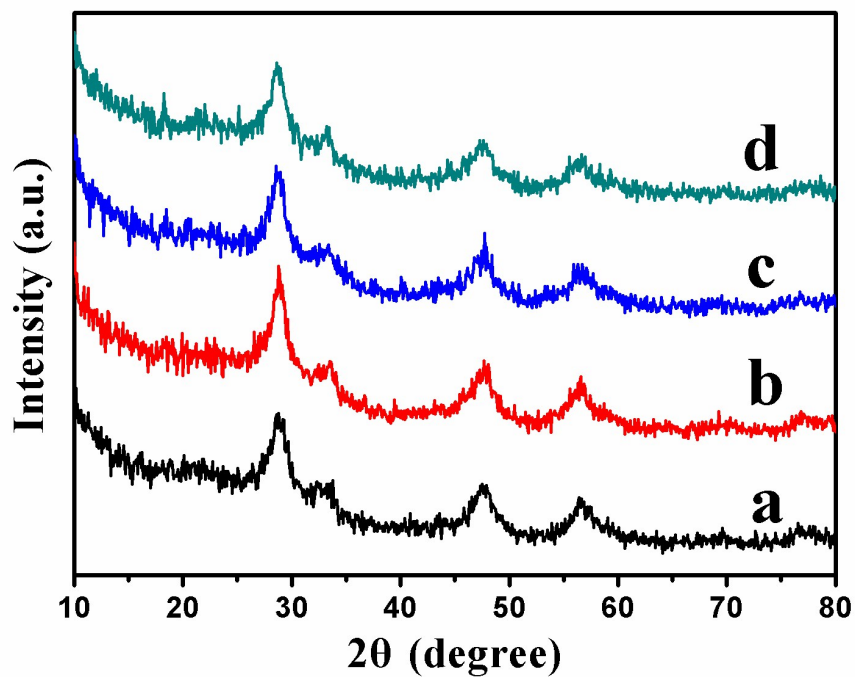

Fig.S3 The XRD patterns of the cobalt-ceria products when the volume of the added 0.5M Co(NO<sub>3</sub>)<sub>2</sub> solution is as follows: (a) 115 μL, (b) 230 μL, (c) 460 μL, (d) 575 μL.

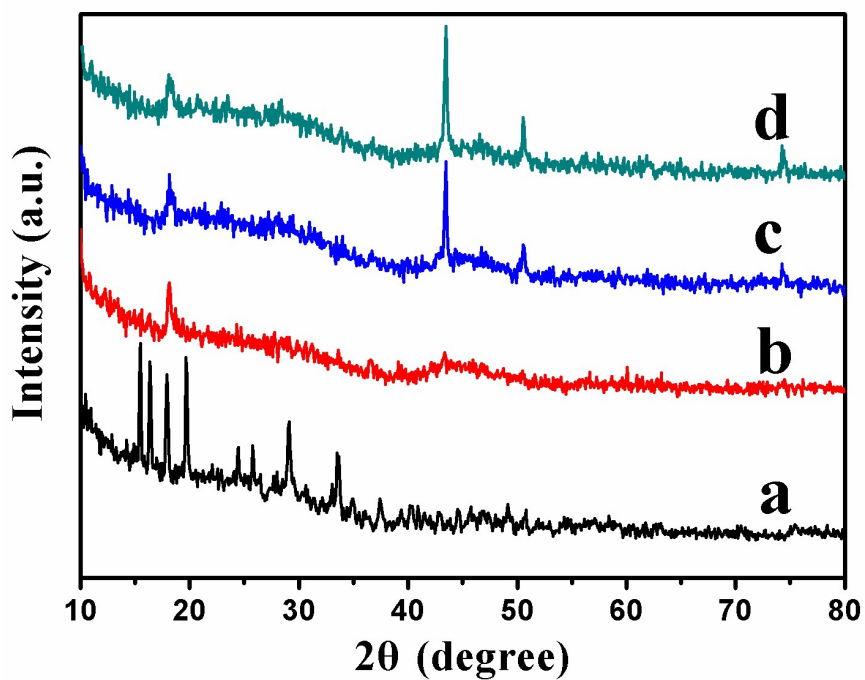

Fig.S4 The XRD patterns of the cobalt-ceria products when the volume of the added 0.5M Cu(NO<sub>3</sub>)<sub>2</sub> solution is as follows: (a) 115 μL, (b) 230 μL, (c) 460 μL, (d) 575 μL.
